# Supplementary material for: Distortion–interaction analysis along the reaction pathway to reveal the reactivity of the Alder-ene reaction of enes
Source: Royal Society of Chemistry journal article supplement (doi:10.1039/c5ra10345b), 2015-01-01
Supplement: c5ra10345b1.pdf [file c5ra10345b1.pdf]

# Distortion–Interaction Analysis along the Reaction Pathway to Reveal the Reactivity of the Alder-Ene Reaction of Enes

*Supporting Information*

*Rui Jin, Song Liu, and Yu Lan\**

School of Chemistry and Chemical Engineering, Chongqing University, Chongqing, 400030, China.

## Table of contents

|                                                                                                                                                              |          |
|--------------------------------------------------------------------------------------------------------------------------------------------------------------|----------|
| 1. Completes reference for Gaussian 09.                                                                                                                      | Page S2  |
| 2. B3LYP absolute calculation energies, enthalpies, and free energies.                                                                                       | Page S3  |
| 3. M11 absolute calculation energies, enthalpies, and free energies.                                                                                         | Page S3  |
| 4. G3B3 absolute calculation energies, enthalpies, and free energies.                                                                                        | Page S4  |
| 5. CBS-QB3 absolute calculation energies, enthalpies, and free energies.                                                                                     | Page S5  |
| 6. Geometries for all the optimized compounds and transition states.                                                                                         | Page S5  |
| 7. The date of distortion, interaction, and total energies along the reaction pathways of the Ene-reaction between the C-H bond in hetero enes and ethylene. | Page S14 |

### 1. Complete reference for Gaussian 09

Frisch, M. J.; Trucks, G. W.; Schlegel, H. B.; Scuseria, G. E.; Robb, M. A.; Cheeseman, J. R.; Scalmani, G.; Barone, V.; Mennucci, B.; Petersson, G. A.; Nakatsuji, H.; Caricato, M.; Li, X.; Hratchian, H. P.; Izmaylov, A. F.; Bloino, J.; Zheng, G.; Sonnenberg, J. L.; Hada, M.; Ehara, M.; Toyota, K.; Fukuda, R.; Hasegawa, J.; Ishida, M.; Nakajima, T.; Honda, Y.; Kitao, O.; Nakai, H.; Vreven, T.; Montgomery, Jr., J. A.; Peralta, J. E.; Ogliaro, F.; Bearpark, M.; Heyd, J. J.; Brothers, E.; Kudin, K. N.; Staroverov, V. N.; Keith, T.; Kobayashi, R.; Normand, J.; Raghavachari, K.; Rendell, A.; Burant, J. C.; Iyengar, S. S.; Tomasi, J.; Cossi, M.; Rega, N.; Millam, J. M.; Klene, M.; Knox, J. E.; Cross, J. B.; Bakken, V.; Adamo, C.; Jaramillo, J.; Gomperts, R.; Stratmann, R. E.; Yazyev, O.; Austin, A. J.; Cammi, R.; Pomelli, C.; Ochterski, J. W.; Martin, R. L.; Morokuma, K.; Zakrzewski, V. G.; Voth, G. A.; Salvador, P.; Dannenberg, J. J.; Dapprich, S.; Daniels, A. D.; Farkas, O.; Foresman, J. B.; Ortiz, J. V.; Cioslowski, J.; and Fox, D. J. Gaussian 09, revision D.01; Gaussian, Inc.: Wallingford, CT, **2013**.

### 2. B3LYP absolute calculation energies, enthalpies, and free energies.

| Geometry     | $E_{(\text{elec-B3LYP})}^1$ | $H_{(\text{corr-B3LYP})}^2$ | $G_{(\text{corr-B3LYP})}^3$ | IF <sup>4</sup> |
|--------------|-----------------------------|-----------------------------|-----------------------------|-----------------|
| <b>2-ts</b>  | -196.504203338              | 0.136697                    | 0.101489                    | -1251.85        |
| <b>3</b>     | -196.593182611              | 0.143823                    | 0.106776                    | -               |
| <b>5-ts</b>  | -447.900975727              | 0.128393                    | 0.090424                    | -363.65         |
| <b>6</b>     | -447.997480505              | 0.133106                    | 0.092381                    | -               |
| <b>8-ts</b>  | -212.552372284              | 0.125348                    | 0.090268                    | -1291.85        |
| <b>9</b>     | -212.638952966              | 0.132668                    | 0.095971                    | -               |
| <b>11-ts</b> | -499.165914608              | 0.119372                    | 0.082454                    | -1139.94        |
| <b>12</b>    | -499.241751964              | 0.125629                    | 0.085877                    | -               |
| <b>14-ts</b> | -232.432594442              | 0.112354                    | 0.077392                    | -1039.34        |
| <b>15</b>    | -232.506492415              | 0.120021                    | 0.083939                    | -               |
| <b>17-ts</b> | -555.413110167              | 0.110511                    | 0.074025                    | -1203.63        |
| <b>18</b>    | -555.483614854              | 0.116948                    | 0.078581                    | -               |

<sup>1</sup>The electronic energy calculated by B3LYP in gas phase. <sup>2</sup>The thermal correction to enthalpy calculated by B3LYP in gas phase. <sup>3</sup>The thermal correction to Gibbs free energy calculated by B3LYP in gas phase. <sup>4</sup>The B3LYP calculated imaginary frequencies for the transition states.

### 3. M11 absolute calculation energies, enthalpies, and free energies.

| Geometry     | $E_{(\text{elec-M11})}^1$ | $H_{(\text{corr-M11})}^2$ | $G_{(\text{corr-M11})}^3$ | IF <sup>4</sup> |
|--------------|---------------------------|---------------------------|---------------------------|-----------------|
| <b>2-ts</b>  | -196.345221298            | 0.136597                  | 0.101678                  | -1209.70        |
| <b>3</b>     | -196.437949724            | 0.143419                  | 0.106688                  | -               |
| <b>5-ts</b>  | -447.734474951            | 0.127903                  | 0.090028                  | -446.33         |
| <b>6</b>     | -447.837228022            | 0.132551                  | 0.091822                  | -               |
| <b>8-ts</b>  | -212.397611674            | 0.125566                  | 0.090749                  | -1400.31        |
| <b>9</b>     | -212.49086203             | 0.132268                  | 0.095529                  | -               |
| <b>11-ts</b> | -499.005642423            | 0.119636                  | 0.083083                  | -1006.30        |

|              |                |          |          |          |
|--------------|----------------|----------|----------|----------|
| <b>12</b>    | -499.085097188 | 0.125376 | 0.085498 | -        |
| <b>14-ts</b> | -232.279526128 | 0.112376 | 0.077638 | -1323.69 |
| <b>15</b>    | -232.361052258 | 0.119882 | 0.084079 | -        |
| <b>17-ts</b> | -555.258929811 | 0.110595 | 0.074450 | -1156.97 |
| <b>18</b>    | -555.334739374 | 0.116907 | 0.079042 | -        |

<sup>1</sup>The electronic energy calculated by M11 in gas phase. <sup>2</sup>The thermal correction to enthalpy calculated by M11 in gas phase. <sup>3</sup>The thermal correction to Gibbs free energy calculated by M11 in gas phase. <sup>4</sup>The M11 calculated imaginary frequencies for the transition states.

#### 4. G3B3 absolute calculation energies, enthalpies, and free energies.

| Geometry     | $E_{(\text{elec-G3B3})}^1$ | $H_{(\text{elec-G3B3})}^2$ | $G_{(\text{elec-G3B3})}^3$ | IF <sup>4</sup> |
|--------------|----------------------------|----------------------------|----------------------------|-----------------|
| <b>2-ts</b>  | -196.232006                | -196.231062                | -196.266420                | -1194.43        |
| <b>3</b>     | -196.320609                | -196.319665                | -196.356934                | -               |
| <b>5-ts</b>  | -447.502946                | -447.502002                | -447.540369                | -363.92         |
| <b>6</b>     | -447.598378                | -447.597434                | -447.638477                | -               |
| <b>8-ts</b>  | -212.279105                | -212.278160                | -212.313430                | -1311.02        |
| <b>9</b>     | -212.364205                | -212.363261                | -212.400058                | -               |
| <b>11-ts</b> | -498.776229                | -498.775285                | -498.812445                | -1112.30        |
| <b>12</b>    | -498.852250                | -498.851306                | -498.891303                | -               |
| <b>14-ts</b> | -232.155523                | -232.154579                | -232.189723                | -1145.15        |
| <b>15</b>    | -232.230057                | -232.229113                | -232.265412                | -               |
| <b>17-ts</b> | -555.030902                | -555.029958                | -555.066678                | -1205.44        |
| <b>18</b>    | -555.102398                | -555.101453                | -555.140092                | -               |

<sup>1</sup>The electronic energy calculated by G3B3 in gas phase. <sup>2</sup>The thermal correction to enthalpy calculated by G3B3 in gas phase. <sup>3</sup>The thermal correction to Gibbs free energy calculated by G3B3 in gas phase. <sup>4</sup>The G3B3 calculated imaginary frequencies for the transition states.

## 5. CBS-QB3 absolute calculation energies, enthalpies, and free energies.

| Geometry     | $E_{(\text{elec-CBS-QB3})}^1$ | $H_{(\text{elec-CBS-QB3})}^2$ | $G_{(\text{elec-CBS-QB3})}^3$ | IF <sup>4</sup> |
|--------------|-------------------------------|-------------------------------|-------------------------------|-----------------|
| <b>2-ts</b>  | -196.003289                   | -196.002345                   | -196.037593                   | -1251.13        |
| <b>3</b>     | -196.089993                   | -196.089048                   | -196.126148                   | -               |
| <b>5-ts</b>  | -447.026787                   | -447.025843                   | -447.063887                   | -372.99         |
| <b>6</b>     | -447.121200                   | -447.120256                   | -447.160969                   | -               |
| <b>8-ts</b>  | -212.050711                   | -212.049767                   | -212.084872                   | -1301.49        |
| <b>9</b>     | -212.134292                   | -212.133348                   | -212.170000                   | -               |
| <b>11-ts</b> | -498.295395                   | -498.294450                   | -498.331411                   | -1129.39        |
| <b>12</b>    | -498.369109                   | -498.368165                   | -498.407508                   | -               |
| <b>14-ts</b> | -231.928464                   | -231.927519                   | -231.962500                   | -1076.22        |
| <b>15</b>    | -232.002288                   | -232.001344                   | -232.037464                   | -               |
| <b>17-ts</b> | -554.545307                   | -554.544363                   | -554.580898                   | -1198.56        |
| <b>18</b>    | -554.615307                   | -554.614363                   | -554.652760                   | -               |

<sup>1</sup>The electronic energy calculated by CBS-QB3 in gas phase. <sup>2</sup>The thermal correction to enthalpy calculated by CBS-QB3 in gas phase. <sup>3</sup>The thermal correction to Gibbs free energy calculated by CBS-QB3 in gas phase. <sup>4</sup>The CBS-QB3 calculated imaginary frequencies for the transition states.

## 6. Geometries for all the optimized compounds and transition states.

### 6.1 B3LYP geometries for all the optimized compounds and transition states.

|          |             |             |             |             |             |             |             |
|----------|-------------|-------------|-------------|-------------|-------------|-------------|-------------|
|          |             |             |             | <b>2-ts</b> |             |             |             |
|          |             |             |             | C           | -0.55247200 | 1.25804100  | 0.26633500  |
|          |             |             |             | H           | -0.42017100 | 1.22519800  | 1.34288100  |
| <b>1</b> |             |             |             | C           | -1.30515300 | 0.26807300  | -0.34304100 |
| C        | -1.23400100 | 0.16278200  | -0.00001200 | H           | -1.59922200 | 0.41135700  | -1.38079900 |
| H        | -1.80743100 | -0.15322900 | -0.87854500 | C           | -1.25565300 | -1.05076400 | 0.15940700  |
| H        | -1.80735700 | -0.15298800 | 0.87865900  | H           | 0.06508700  | -1.23038700 | 0.02063600  |
| H        | -1.18222700 | 1.25419600  | -0.00016300 | H           | -1.77825200 | -1.83506500 | -0.38292200 |
| C        | 0.13370900  | -0.45386900 | 0.00003300  | H           | -1.28868200 | -1.18224000 | 1.24059700  |
| H        | 0.16548500  | -1.54232200 | 0.00004800  | C           | 1.43246500  | 0.54370300  | -0.10801400 |
| C        | 1.28163000  | 0.22031400  | -0.00000100 | H           | 1.54308900  | 1.01462200  | -1.07730300 |
| H        | 2.23963300  | -0.28736600 | -0.00001500 | H           | 1.81421500  | 1.13155100  | 0.71776200  |
| H        | 1.30387100  | 1.30634600  | -0.00010900 | C           | 1.46045400  | -0.85923100 | -0.02287200 |

|   |             |             |             |
|---|-------------|-------------|-------------|
| H | 1.67481800  | -1.42971600 | -0.92298100 |
| H | 1.82120900  | -1.31763300 | 0.89405300  |
| H | -0.50993600 | 2.25337300  | -0.16281900 |

### 3

|   |             |             |             |
|---|-------------|-------------|-------------|
| C | -1.52360000 | 0.52298300  | 0.00001300  |
| H | -2.13493600 | 1.42446200  | 0.00003500  |
| C | 0.86186700  | -0.46766000 | 0.00004800  |
| H | 0.63320700  | -1.08354800 | -0.87679900 |
| H | 0.63324500  | -1.08329200 | 0.87708400  |
| C | 2.35187700  | -0.11312700 | -0.00004300 |
| H | 2.62006700  | 0.47558100  | 0.88297100  |
| H | 2.97409100  | -1.01215100 | 0.00008400  |
| H | 2.62002600  | 0.47530500  | -0.88325400 |
| C | -2.14082000 | -0.65741400 | 0.00008100  |
| H | -3.22307900 | -0.72292800 | 0.00014000  |
| H | -1.60023000 | -1.59752000 | 0.00009900  |
| C | -0.03815100 | 0.77050800  | -0.00009200 |
| H | 0.20525100  | 1.39604200  | -0.87074700 |
| H | 0.20531800  | 1.39630400  | 0.87035300  |

### 4

|    |             |             |             |
|----|-------------|-------------|-------------|
| Si | -1.15326400 | 0.10186100  | 0.00000500  |
| H  | -1.43197800 | 1.55341900  | -0.00015900 |
| H  | -2.33866800 | -0.77756000 | 0.00001100  |
| C  | 0.44166700  | -0.53290500 | -0.00006200 |
| H  | 0.53311900  | -1.61780000 | -0.00007300 |
| C  | 1.74124000  | 0.22590600  | 0.00004700  |
| H  | 2.34639100  | -0.02548200 | 0.87942600  |
| H  | 2.34657700  | -0.02550500 | -0.87919700 |
| H  | 1.59282300  | 1.30886800  | 0.00001700  |

### 5-ts

|    |             |             |             |
|----|-------------|-------------|-------------|
| C  | 1.41820800  | 0.33594600  | -0.40656300 |
| H  | 1.77081600  | 0.36856400  | -1.43503200 |
| Si | 0.61637900  | -1.12543200 | 0.16464600  |
| H  | 0.46915700  | -1.30881400 | 1.62805400  |
| C  | -1.55359200 | -0.54701600 | -0.24842000 |
| H  | -1.86698200 | -1.30412900 | 0.46898500  |
| H  | -1.62521000 | -0.86670900 | -1.28342300 |
| C  | -1.86936500 | 0.77504300  | 0.04923600  |
| H  | -2.14388200 | 1.07239100  | 1.05455300  |
| H  | -0.20464100 | 1.61258200  | 0.08953100  |
| H  | -2.06190300 | 1.49384900  | -0.73757600 |
| C  | 0.96084200  | 1.59243900  | 0.18276700  |
| H  | 1.10177100  | 1.67411300  | 1.26476700  |
| H  | 1.33463900  | 2.49680300  | -0.30232700 |
| H  | 0.86037000  | -2.42107700 | -0.51469600 |

### 6

|    |             |             |             |
|----|-------------|-------------|-------------|
| C  | -1.72410300 | -0.30253800 | -0.40216100 |
| H  | -1.85035200 | -0.94660100 | -1.27324800 |
| Si | -0.07397500 | 0.55662600  | -0.16507000 |
| H  | -0.17077900 | 1.42145500  | 1.04462700  |
| C  | 1.34503900  | -0.68253600 | 0.02743000  |
| H  | 1.34673200  | -1.34041100 | -0.84989500 |
| H  | 1.12043700  | -1.32687700 | 0.88507900  |
| C  | 2.72985300  | -0.03347900 | 0.19979400  |
| H  | 2.76648500  | 0.60304600  | 1.08888800  |
| H  | 3.51415600  | -0.78876500 | 0.30617500  |
| H  | 2.99019200  | 0.59038200  | -0.66035000 |
| C  | -2.76246200 | -0.17904500 | 0.43025400  |
| H  | -2.71601300 | 0.44717400  | 1.31737100  |

|   |             |             |             |
|---|-------------|-------------|-------------|
| H | -3.70486200 | -0.69426700 | 0.26252100  |
| H | 0.20969100  | 1.42768900  | -1.34208700 |

### 7

|   |             |             |             |
|---|-------------|-------------|-------------|
| C | -0.18899200 | 0.40501100  | -0.00013400 |
| H | -0.26986000 | 1.50180600  | 0.00019300  |
| H | -2.07138600 | 0.19185000  | 0.00028600  |
| C | 1.20575500  | -0.14099400 | 0.00001000  |
| H | 1.75385200  | 0.21571000  | -0.87880800 |
| H | 1.75293400  | 0.21405100  | 0.88008400  |
| H | 1.18751500  | -1.23122800 | -0.00093000 |
| N | -1.20766200 | -0.35375600 | -0.00001200 |

### 8-ts

|   |             |             |             |
|---|-------------|-------------|-------------|
| C | 1.30169500  | 0.29660900  | 0.27947400  |
| H | 1.78627200  | 0.48846000  | 1.24286300  |
| C | 1.26641400  | -1.02255900 | -0.20205600 |
| H | 1.12161700  | -1.16842300 | -1.26860300 |
| H | 1.87710500  | -1.77436300 | 0.28731800  |
| N | 0.50664400  | 1.19446000  | -0.27752200 |
| H | 0.50671000  | 2.06620700  | 0.25000100  |
| C | -1.44838000 | 0.53889800  | -0.05201900 |
| H | -1.72029400 | 0.94020700  | -1.01731300 |
| H | -1.62376000 | 1.20141700  | 0.78653500  |
| C | -1.43929200 | -0.85137100 | 0.15228900  |
| H | -1.65303900 | -1.22145300 | 1.15236000  |
| H | -1.81780100 | -1.48193300 | -0.64822200 |
| H | -0.10594000 | -1.18080700 | 0.09158500  |

### 9

|   |             |             |             |
|---|-------------|-------------|-------------|
| C | 1.41702300  | 0.54474900  | 0.00127600  |
| H | 1.93522300  | 1.49906800  | 0.03566600  |
| C | -0.83220300 | -0.47702500 | 0.05775900  |
| H | -0.64213700 | -1.00950700 | 1.00302000  |
| H | -0.59455800 | -1.17829900 | -0.74953000 |
| C | -2.29805700 | -0.06649700 | -0.03015100 |
| H | -2.51264900 | 0.41933300  | -0.98546100 |
| H | -2.94548500 | -0.94151500 | 0.06159900  |
| H | -2.56479500 | 0.62634700  | 0.77481700  |
| C | 2.12616300  | -0.59537800 | -0.00944300 |
| H | 3.20643900  | -0.55228800 | -0.00269700 |
| H | 1.66742500  | -1.57510200 | -0.04147300 |
| N | 0.04285000  | 0.67659900  | -0.07240700 |
| H | -0.32696400 | 1.54067500  | 0.29425500  |

### 10

|   |             |             |             |
|---|-------------|-------------|-------------|
| C | -0.37435300 | 0.53009000  | 0.00009400  |
| H | -0.45447800 | 1.61478500  | -0.00009800 |
| P | 1.12847100  | -0.22201900 | 0.00000200  |
| H | 1.92277000  | 0.96630100  | -0.00019800 |
| C | -1.67703400 | -0.20995000 | -0.00003500 |
| H | -2.27434700 | 0.06062500  | 0.87860700  |
| H | -2.27468400 | 0.06135800  | -0.87821300 |
| H | -1.53799900 | -1.29362200 | -0.00049000 |

### 11-ts

|   |             |             |             |
|---|-------------|-------------|-------------|
| C | -1.14036100 | 0.69291700  | 0.41445500  |
| H | -1.45601900 | 0.86164400  | 1.44003000  |
| P | -1.03381700 | -0.90396600 | -0.23477000 |
| H | -1.47060100 | -1.61483600 | 0.92583500  |
| C | 1.38647000  | -0.97580200 | 0.08490100  |
| H | 1.50132000  | -1.61601800 | -0.78020100 |

|   |             |             |             |
|---|-------------|-------------|-------------|
| H | 1.30473500  | -1.49660800 | 1.03136200  |
| C | 1.94785200  | 0.30873200  | 0.05601600  |
| H | 2.30440500  | 0.74368900  | 0.98586100  |
| H | 2.48750000  | 0.62193000  | -0.83306100 |
| H | 0.81709900  | 1.24977200  | -0.04683200 |
| C | -0.39234400 | 1.70700500  | -0.23191800 |
| H | -0.42261700 | 2.71415400  | 0.17999600  |
| H | -0.36826900 | 1.69865600  | -1.32216300 |

## 12

|   |             |             |             |
|---|-------------|-------------|-------------|
| C | -1.56572900 | 0.33572000  | 0.37369300  |
| H | -1.50374400 | 1.07956700  | 1.16707900  |
| C | 1.23089000  | 0.65677300  | -0.10217700 |
| H | 1.10436800  | 1.37519300  | 0.71308400  |
| H | 1.04753500  | 1.19504200  | -1.03687400 |
| C | 2.65073400  | 0.07927500  | -0.09484300 |
| H | 2.79913700  | -0.62909700 | -0.91459900 |
| H | 3.39407100  | 0.87421500  | -0.20315300 |
| H | 2.86338200  | -0.44588600 | 0.84094700  |
| C | -2.70372800 | 0.19937400  | -0.30695200 |
| H | -3.57536300 | 0.80951200  | -0.08926300 |
| H | -2.80570100 | -0.52999400 | -1.10510700 |
| P | -0.07998400 | -0.68620300 | 0.00389400  |
| H | 0.20307300  | -1.06236000 | 1.35116000  |

## 13

|   |             |             |             |
|---|-------------|-------------|-------------|
| C | 0.23341300  | 0.39665300  | 0.00008100  |
| H | 0.30842700  | 1.50631100  | -0.00016700 |
| O | 1.23428400  | -0.27638500 | -0.00002300 |
| C | -1.16831600 | -0.14827600 | -0.00003000 |
| H | -1.70486500 | 0.22690400  | -0.87853500 |
| H | -1.16400300 | -1.23814300 | -0.00067900 |
| H | -1.70441300 | 0.22573900  | 0.87925700  |

## 14-ts

|   |             |             |             |
|---|-------------|-------------|-------------|
| C | -1.25113700 | -0.34771000 | 0.29551100  |
| H | -1.69051700 | -0.55504800 | 1.28652300  |
| C | -1.34861500 | 0.95220400  | -0.20429100 |
| H | -1.15497800 | 1.12670300  | -1.25779200 |
| H | 0.13912400  | 1.12007300  | 0.11092600  |
| O | -0.48407600 | -1.21096900 | -0.21940000 |
| C | 1.48834700  | -0.52203000 | -0.03698200 |
| H | 1.61705600  | -1.18154900 | 0.80953600  |
| H | 1.68328200  | -0.95862200 | -1.00552600 |
| C | 1.41721600  | 0.86917100  | 0.12965400  |
| H | 1.75518300  | 1.48579400  | -0.70071300 |
| H | 1.67314000  | 1.26731300  | 1.10986600  |
| H | -1.98454600 | 1.67328900  | 0.29902400  |

## 15

|   |            |             |            |
|---|------------|-------------|------------|
| C | 1.35892700 | -0.55635700 | 0.00005900 |
|---|------------|-------------|------------|

|   |             |             |             |
|---|-------------|-------------|-------------|
| H | 1.84224700  | -1.52724600 | 0.00004400  |
| C | -0.79397200 | 0.46787200  | -0.00003000 |
| H | -0.55514400 | 1.06679600  | -0.88741900 |
| H | -0.55512300 | 1.06685600  | 0.88731300  |
| C | -2.24920800 | 0.04209100  | -0.00000600 |
| H | -2.47854900 | -0.55365100 | 0.88624800  |
| H | -2.89567400 | 0.92369900  | -0.00034900 |
| H | -2.47836600 | -0.55419500 | -0.88594300 |
| C | 2.06109400  | 0.57980600  | 0.00000100  |
| H | 3.14105900  | 0.52268700  | -0.00005800 |
| H | 1.61337000  | 1.56394400  | -0.00005300 |
| O | 0.01314200  | -0.71367000 | 0.00000800  |

## 16

|   |             |             |             |
|---|-------------|-------------|-------------|
| S | -1.14469700 | -0.12577600 | 0.00000400  |
| C | 0.34828400  | 0.51290600  | -0.00002500 |
| H | 0.45524000  | 1.60109900  | 0.00007800  |
| C | 1.63760500  | -0.23973400 | -0.00000700 |
| H | 2.23260600  | 0.04521800  | -0.87674200 |
| H | 2.23233200  | 0.04483700  | 0.87704000  |
| H | 1.47963600  | -1.31777300 | -0.00024700 |

## 17-ts

|   |             |             |             |
|---|-------------|-------------|-------------|
| C | -1.18059000 | 0.59253100  | 0.40184200  |
| H | -1.55510900 | 0.76025000  | 1.41123200  |
| C | -0.53536900 | 1.65022600  | -0.25627700 |
| H | 0.73688000  | 1.21271100  | -0.03128700 |
| H | -0.45571800 | 1.60224900  | -1.33958700 |
| S | -0.98526800 | -0.98289300 | -0.13477500 |
| C | 1.47964500  | -0.89167400 | 0.07516400  |
| H | 1.55803900  | -1.50221100 | -0.81361900 |
| H | 1.41684200  | -1.42710400 | 1.01261200  |
| C | 1.90653200  | 0.43918000  | 0.05102900  |
| H | 2.26237100  | 0.88053500  | 0.97901700  |
| H | 2.39860200  | 0.80378100  | -0.84698100 |
| H | -0.61893000 | 2.65450100  | 0.15446600  |

## 18

|   |             |             |             |
|---|-------------|-------------|-------------|
| C | 1.68287300  | -0.31164700 | -0.00009300 |
| H | 2.37985700  | -1.14467300 | -0.00017400 |
| C | -0.96176700 | 0.64311700  | 0.00045500  |
| H | -0.69253700 | 1.22254100  | -0.88568100 |
| H | -0.69328500 | 1.22164300  | 0.88740400  |
| C | -2.45153300 | 0.30750800  | -0.00033400 |
| H | -2.73142100 | -0.26925100 | 0.88439400  |
| H | -3.03841400 | 1.22991200  | -0.00011600 |
| H | -2.73068700 | -0.26836300 | -0.88587400 |
| C | 2.13484800  | 0.94502200  | -0.00014600 |
| H | 3.20200700  | 1.13229700  | -0.00025800 |
| H | 1.48578500  | 1.81121300  | -0.00009600 |
| S | 0.02451100  | -0.90245700 | 0.00006900  |

## 6.2 M11 geometries for all the optimized compounds and transition states.

### 1

|   |             |             |             |
|---|-------------|-------------|-------------|
| C | -1.23057200 | 0.16245900  | -0.00000400 |
| H | -1.80248200 | -0.15245300 | -0.88247300 |
| H | -1.80243200 | -0.15225300 | 0.88256800  |
| H | -1.16813100 | 1.25627000  | -0.00012800 |
| C | 0.13636700  | -0.45853500 | 0.00003500  |
| H | 0.17456300  | -1.55069300 | 0.00009700  |

|   |            |             |             |
|---|------------|-------------|-------------|
| C | 1.27420800 | 0.22343600  | -0.00002200 |
| H | 2.23954400 | -0.27921400 | -0.00001200 |
| H | 1.27891900 | 1.31418000  | -0.00011100 |

### 2-ts

|   |             |            |            |
|---|-------------|------------|------------|
| C | -0.50900600 | 1.24389400 | 0.27776900 |
| H | -0.38559800 | 1.17315200 | 1.35878200 |

|   |             |             |             |
|---|-------------|-------------|-------------|
| C | -1.28500900 | 0.29075800  | -0.35016900 |
| H | -1.58254600 | 0.45283200  | -1.38780100 |
| C | -1.27138300 | -1.02442400 | 0.15761000  |
| H | 0.01873800  | -1.23880100 | 0.01590200  |
| H | -1.81595500 | -1.80247800 | -0.37834000 |
| H | -1.30308800 | -1.13886300 | 1.24443000  |
| C | 1.41024400  | 0.52397900  | -0.11656800 |
| H | 1.51905100  | 0.98285400  | -1.09725100 |
| H | 1.81811300  | 1.11808200  | 0.69836900  |
| C | 1.44728000  | -0.86967100 | -0.02078600 |
| H | 1.62950900  | -1.45685300 | -0.92032800 |
| H | 1.78959200  | -1.32993700 | 0.90556700  |
| H | -0.44056800 | 2.25279500  | -0.12646800 |

### 3

|   |             |             |             |
|---|-------------|-------------|-------------|
| C | -1.51930000 | 0.52581100  | 0.00000000  |
| H | -2.15100100 | 1.41822500  | -0.00005800 |
| C | 0.84332300  | -0.46724000 | -0.00004000 |
| H | 0.60414400  | -1.07941300 | -0.88132100 |
| H | 0.60406200  | -1.07931900 | 0.88128400  |
| C | 2.33151800  | -0.11663500 | 0.00000100  |
| H | 2.59466800  | 0.47604700  | 0.88592100  |
| H | 2.95789300  | -1.01634300 | 0.00010100  |
| H | 2.59474900  | 0.47590600  | -0.88598900 |
| C | -2.10466100 | -0.66526500 | 0.00018400  |
| H | -3.18940000 | -0.75721000 | 0.00026400  |
| H | -1.53068000 | -1.59150700 | 0.00026600  |
| C | -0.03557900 | 0.78121300  | -0.00014200 |
| H | 0.21181700  | 1.40303400  | -0.87556600 |
| H | 0.21194100  | 1.40327200  | 0.87507600  |

### 4

|    |             |             |             |
|----|-------------|-------------|-------------|
| Si | -1.14385700 | 0.10240500  | -0.00004600 |
| H  | -1.40309200 | 1.56489000  | -0.00007800 |
| H  | -2.34946700 | -0.76066200 | -0.00007400 |
| C  | 0.43522400  | -0.54077000 | 0.00002700  |
| H  | 0.52997500  | -1.62889200 | 0.00004700  |
| C  | 1.73111700  | 0.22791900  | 0.00006200  |
| H  | 2.33452500  | -0.02199600 | 0.88337500  |
| H  | 2.33458000  | -0.02200700 | -0.88321100 |
| H  | 1.56942800  | 1.31210700  | 0.00005000  |

### 5-ts

|    |             |             |             |
|----|-------------|-------------|-------------|
| C  | 1.32548200  | 0.50236200  | -0.43731800 |
| H  | 1.66598000  | 0.60255500  | -1.46790700 |
| Si | 0.79292900  | -1.04214400 | 0.16063500  |
| H  | 0.62645500  | -1.21345200 | 1.62963500  |
| C  | -1.51195300 | -0.71734500 | -0.23252700 |
| H  | -1.67678400 | -1.48598900 | 0.52475100  |
| H  | -1.52296800 | -1.07014700 | -1.26219200 |
| C  | -1.91924200 | 0.56884000  | 0.04103700  |
| H  | -2.23375000 | 0.85220500  | 1.04404600  |
| H  | -0.44767700 | 1.53276500  | 0.09288200  |
| H  | -2.20354800 | 1.24107700  | -0.76612900 |
| C  | 0.72608600  | 1.66420700  | 0.19955300  |
| H  | 0.84213200  | 1.71173300  | 1.28953900  |
| H  | 0.97333600  | 2.63157500  | -0.24803200 |
| H  | 1.15358600  | -2.32069700 | -0.50995700 |

### 6

|    |             |             |             |
|----|-------------|-------------|-------------|
| C  | -1.72125700 | -0.32484300 | -0.39309900 |
| H  | -1.87537900 | -1.01844100 | -1.22491500 |
| Si | -0.06881600 | 0.52502400  | -0.19613000 |

|   |             |             |             |
|---|-------------|-------------|-------------|
| H | -0.16714100 | 1.43656200  | 0.98710900  |
| C | 1.33882300  | -0.69562500 | 0.04902600  |
| H | 1.36387400  | -1.38255300 | -0.80863100 |
| H | 1.11690200  | -1.31415700 | 0.92941200  |
| C | 2.69972400  | 0.00119600  | 0.21118300  |
| H | 2.70225300  | 0.67111500  | 1.08040100  |
| H | 3.50977200  | -0.72446000 | 0.35075400  |
| H | 2.94440900  | 0.60609500  | -0.67112100 |
| C | -2.73650300 | -0.13021900 | 0.44680400  |
| H | -2.65390500 | 0.55096500  | 1.29619200  |
| H | -3.69515100 | -0.63735500 | 0.32539600  |
| H | 0.23306400  | 1.35883200  | -1.40227000 |

### 7

|   |             |             |             |
|---|-------------|-------------|-------------|
| C | -0.19087900 | 0.40494100  | -0.00017800 |
| H | -0.28349700 | 1.50412900  | 0.00027300  |
| H | -2.06928800 | 0.18471600  | 0.00033600  |
| C | 1.20520800  | -0.13969200 | 0.00001600  |
| H | 1.75181100  | 0.21629400  | -0.88271500 |
| H | 1.75078500  | 0.21451300  | 0.88412300  |
| H | 1.17717600  | -1.23250400 | -0.00099300 |
| N | -1.20185200 | -0.35409200 | -0.00000800 |

### 8-ts

|   |             |             |             |
|---|-------------|-------------|-------------|
| C | 1.28327000  | 0.31420600  | 0.28045700  |
| H | 1.77542300  | 0.52747900  | 1.23911700  |
| C | 1.27347900  | -1.00014600 | -0.20775300 |
| H | 1.12117300  | -1.12607800 | -1.27959100 |
| H | 1.90825100  | -1.74497300 | 0.26821000  |
| N | 0.45844100  | 1.18048400  | -0.26807600 |
| H | 0.44048600  | 2.06233800  | 0.24023600  |
| C | -1.41153300 | 0.52045300  | -0.06595800 |
| H | -1.71258200 | 0.89591300  | -1.03912400 |
| H | -1.62330300 | 1.19198900  | 0.76432900  |
| C | -1.42691500 | -0.85892700 | 0.16541400  |
| H | -1.60424600 | -1.21882800 | 1.17857500  |
| H | -1.78231700 | -1.51505300 | -0.62781000 |
| H | -0.04177800 | -1.18969700 | 0.09962600  |

### 9

|   |             |             |             |
|---|-------------|-------------|-------------|
| C | 1.41047000  | 0.55045800  | 0.00462800  |
| H | 1.94789600  | 1.49857100  | 0.04458900  |
| C | -0.81174500 | -0.47847300 | 0.02230800  |
| H | -0.58165900 | -1.04684400 | 0.94117000  |
| H | -0.59006300 | -1.14333800 | -0.82590000 |
| C | -2.27839400 | -0.06961300 | -0.00256800 |
| H | -2.51223200 | 0.47330000  | -0.92584300 |
| H | -2.92743200 | -0.94976200 | 0.05219500  |
| H | -2.51947900 | 0.57744500  | 0.85103700  |
| C | 2.08873000  | -0.60413200 | 0.00354800  |
| H | 3.17324000  | -0.58918400 | 0.02912600  |
| H | 1.59426400  | -1.57113600 | -0.03616900 |
| N | 0.04432500  | 0.68520000  | -0.07424700 |
| H | -0.34916900 | 1.56510100  | 0.22203200  |

### 10

|   |             |             |             |
|---|-------------|-------------|-------------|
| C | -0.36510000 | 0.52998500  | 0.00003300  |
| H | -0.43876600 | 1.61945400  | -0.00004900 |
| P | 1.11990500  | -0.22334900 | 0.00000000  |
| H | 1.91488000  | 0.96629800  | -0.00005700 |
| C | -1.67096100 | -0.20839200 | -0.00001800 |
| H | -2.26526400 | 0.06440000  | 0.88269200  |



|   |             |             |             |
|---|-------------|-------------|-------------|
| H | -2.26571000 | 0.06513100  | -0.88219000 |
| H | -1.52735000 | -1.29460500 | -0.00047700 |

### 11-ts

|   |             |             |             |
|---|-------------|-------------|-------------|
| C | -1.13726200 | 0.65393600  | 0.43114400  |
| H | -1.43418800 | 0.80650800  | 1.46864100  |
| P | -0.99153500 | -0.91160000 | -0.24180600 |
| H | -1.39523300 | -1.65503700 | 0.91242900  |
| C | 1.37236200  | -0.94033500 | 0.09209200  |
| H | 1.50879700  | -1.59481800 | -0.76530700 |
| H | 1.29547800  | -1.44870200 | 1.05110200  |
| C | 1.92936800  | 0.33526500  | 0.04961500  |
| H | 2.25654300  | 0.80408000  | 0.97724400  |
| H | 2.45217000  | 0.65820100  | -0.84964300 |
| H | 0.76739300  | 1.28664600  | -0.05816800 |
| C | -0.43881400 | 1.69174400  | -0.23274800 |
| H | -0.49277500 | 2.70189300  | 0.17695300  |
| H | -0.43909400 | 1.67156700  | -1.32677900 |

### 12

|   |             |             |             |
|---|-------------|-------------|-------------|
| C | -1.54877900 | 0.33889300  | 0.37309600  |
| H | -1.47561500 | 1.09885600  | 1.15570500  |
| C | 1.21126800  | 0.66044700  | -0.12005600 |
| H | 1.06964000  | 1.39166300  | 0.68536900  |
| H | 1.03627300  | 1.18313900  | -1.06853900 |
| C | 2.62759500  | 0.07989100  | -0.08315800 |
| H | 2.78101800  | -0.64248800 | -0.89399100 |
| H | 3.38040000  | 0.86980600  | -0.18866000 |
| H | 2.81687300  | -0.43820300 | 0.86546800  |
| C | -2.68598700 | 0.19310800  | -0.29724400 |
| H | -3.55782200 | 0.81251600  | -0.08501100 |
| H | -2.78688600 | -0.55532900 | -1.08440100 |
| P | -0.07413500 | -0.68774700 | 0.00152400  |
| H | 0.22356000  | -1.03778400 | 1.35537600  |

### 13

|   |             |             |             |
|---|-------------|-------------|-------------|
| C | 0.23541300  | 0.39958300  | -0.00002100 |
| H | 0.32180200  | 1.51120100  | 0.00003100  |
| O | 1.22678400  | -0.27930600 | 0.00000100  |
| C | -1.16599200 | -0.14724200 | -0.00001800 |
| H | -1.70212300 | 0.22496000  | -0.88241400 |
| H | -1.14894400 | -1.23972500 | -0.00056400 |
| H | -1.70153600 | 0.22396600  | 0.88316900  |

### 14-ts

|   |             |             |             |
|---|-------------|-------------|-------------|
| C | -1.23240900 | -0.35988200 | 0.29487400  |
| H | -1.67824600 | -0.59160500 | 1.28028600  |
| C | -1.34027500 | 0.93405200  | -0.20509900 |
| H | -1.13774600 | 1.09196800  | -1.26360900 |
| H | 0.07576300  | 1.11978900  | 0.12041600  |
| O | -0.43595900 | -1.19405600 | -0.21977900 |
| C | 1.43801100  | -0.51120900 | -0.04012100 |
| H | 1.60185100  | -1.17058600 | 0.80737300  |
| H | 1.67062300  | -0.93650900 | -1.01134300 |
| C | 1.40225200  | 0.87300200  | 0.13564300  |
| H | 1.71545600  | 1.50248800  | -0.69718900 |

## 6.3 G3B3 geometries for all the optimized compounds and transition states.

### 1

|   |             |             |             |
|---|-------------|-------------|-------------|
| C | -1.23509400 | 0.16290100  | 0.00000300  |
| H | -1.81225000 | -0.15077400 | -0.88040700 |

|   |             |            |            |
|---|-------------|------------|------------|
| H | 1.63082300  | 1.27093300 | 1.12470700 |
| H | -1.99632700 | 1.65019500 | 0.28580400 |

### 15

|   |             |             |             |
|---|-------------|-------------|-------------|
| C | 1.35412500  | -0.55861600 | 0.00013500  |
| H | 1.85790400  | -1.52432400 | 0.00018300  |
| C | -0.77717500 | 0.46121100  | 0.00003200  |
| H | -0.52739100 | 1.05745500  | -0.89166700 |
| H | -0.52754500 | 1.05747100  | 0.89176400  |
| C | -2.23450300 | 0.04775600  | -0.00008900 |
| H | -2.46060800 | -0.55091900 | 0.88866100  |
| H | -2.88070300 | 0.93287700  | -0.00029500 |
| H | -2.46039900 | -0.55117700 | -0.88872000 |
| C | 2.02789200  | 0.59004800  | -0.00011000 |
| H | 3.11263000  | 0.55621700  | -0.00024600 |
| H | 1.54977600  | 1.56460800  | -0.00031800 |
| O | 0.01428700  | -0.72307500 | 0.00010300  |

### 16

|   |             |             |             |
|---|-------------|-------------|-------------|
| S | -1.13663800 | -0.12696200 | -0.00009200 |
| C | 0.34155100  | 0.51484600  | 0.00017800  |
| H | 0.44105200  | 1.60744500  | 0.00003900  |
| C | 1.63089200  | -0.23931400 | 0.00004500  |
| H | 2.22334300  | 0.04516600  | -0.88088100 |
| H | 2.22323000  | 0.04475200  | 0.88118200  |
| H | 1.46393000  | -1.31915800 | -0.00020400 |

### 17-ts

|   |             |             |             |
|---|-------------|-------------|-------------|
| C | -1.18391200 | 0.53561000  | 0.41792000  |
| H | -1.54571100 | 0.67299900  | 1.44023700  |
| C | -0.60586000 | 1.62479200  | -0.25095200 |
| H | 0.64995300  | 1.26485800  | -0.03890800 |
| H | -0.55015800 | 1.56652800  | -1.33942400 |
| S | -0.90942600 | -1.00226400 | -0.14735900 |
| C | 1.44965200  | -0.83423100 | 0.09711500  |
| H | 1.57925100  | -1.47558900 | -0.77038500 |
| H | 1.42324000  | -1.34187200 | 1.05759300  |
| C | 1.87324500  | 0.48839500  | 0.03392300  |
| H | 2.20284200  | 0.97967600  | 0.94932200  |
| H | 2.32744100  | 0.85390800  | -0.88641100 |
| H | -0.73479700 | 2.62831700  | 0.15769200  |

### 18

|   |             |             |             |
|---|-------------|-------------|-------------|
| C | 1.66980500  | -0.30941200 | -0.00009400 |
| H | 2.39167200  | -1.12616500 | -0.00018200 |
| C | -0.92912000 | 0.63919300  | 0.00006000  |
| H | -0.65057400 | 1.21433900  | -0.89093200 |
| H | -0.65058800 | 1.21429100  | 0.89097900  |
| C | -2.42069900 | 0.31660600  | -0.00004200 |
| H | -2.69804100 | -0.26279700 | 0.88780500  |
| H | -3.00651900 | 1.24266400  | -0.00002000 |
| H | -2.69804000 | -0.26274800 | -0.88792400 |
| C | 2.08409400  | 0.95469600  | 0.00001600  |
| H | 3.14992700  | 1.17104400  | -0.00000100 |
| H | 1.40399500  | 1.80273800  | 0.00017900  |
| S | 0.02085500  | -0.91249100 | 0.00004900  |

|   |             |             |             |
|---|-------------|-------------|-------------|
| H | -1.81216300 | -0.15054400 | 0.88055400  |
| H | -1.18169000 | 1.25681600  | -0.00014000 |
| C | 0.13380300  | -0.45543800 | 0.00001500  |

|   |            |             |             |
|---|------------|-------------|-------------|
| H | 0.16398600 | -1.54622800 | 0.00009000  |
| C | 1.28315500 | 0.22040200  | -0.00002400 |
| H | 2.24518500 | -0.28511200 | 0.00002200  |
| H | 1.30574400 | 1.30865200  | -0.00007700 |

### 2-ts

|   |             |             |             |
|---|-------------|-------------|-------------|
| C | -0.52567900 | 1.25410900  | 0.26907100  |
| H | -0.40311500 | 1.21590200  | 1.34963200  |
| C | -1.30873800 | 0.28413400  | -0.34106300 |
| H | -1.59607900 | 0.43341000  | -1.38241200 |
| C | -1.26510800 | -1.04292100 | 0.15660900  |
| H | 0.02854000  | -1.24380000 | 0.02117300  |
| H | -1.80817600 | -1.81808000 | -0.38504200 |
| H | -1.32024500 | -1.17230800 | 1.24066300  |
| C | 1.42385300  | 0.53522800  | -0.11127300 |
| H | 1.54046100  | 0.99940300  | -1.08647300 |
| H | 1.82582200  | 1.12590500  | 0.70699500  |
| C | 1.46195300  | -0.86829900 | -0.02202200 |
| H | 1.66897000  | -1.44430900 | -0.92303500 |
| H | 1.82073500  | -1.32734500 | 0.89807400  |
| H | -0.47460300 | 2.25771300  | -0.14751100 |

### 3

|   |             |             |             |
|---|-------------|-------------|-------------|
| C | -1.52465400 | 0.52433600  | 0.00000300  |
| H | -2.13971000 | 1.42604500  | -0.00002000 |
| C | 0.85929500  | -0.46600200 | 0.00004300  |
| H | 0.62680700  | -1.08234400 | -0.87854400 |
| H | 0.62685000  | -1.08211900 | 0.87879900  |
| C | 2.35106100  | -0.11630000 | -0.00004300 |
| H | 2.62145200  | 0.47326600  | 0.88471100  |
| H | 2.97178900  | -1.01939500 | 0.00006800  |
| H | 2.62140800  | 0.47301900  | -0.88497500 |
| C | -2.13705300 | -0.66077900 | 0.00009900  |
| H | -3.22121300 | -0.73517300 | 0.00015300  |
| H | -1.59064200 | -1.60012200 | 0.00012600  |
| C | -0.03785200 | 0.77584600  | -0.00009200 |
| H | 0.20920500  | 1.40198900  | -0.87261600 |
| H | 0.20927800  | 1.40223200  | 0.87223600  |

### 4

|    |             |             |             |
|----|-------------|-------------|-------------|
| Si | -1.15479000 | 0.10175400  | 0.00000800  |
| H  | -1.43606100 | 1.55616300  | -0.00016300 |
| H  | -2.34168400 | -0.78185000 | 0.00000700  |
| C  | 0.44268400  | -0.53292800 | -0.00006500 |
| H  | 0.53887400  | -1.61978800 | -0.00007400 |
| C  | 1.74268600  | 0.22636900  | 0.00004500  |
| H  | 2.34968700  | -0.02558900 | 0.88128000  |
| H  | 2.34987200  | -0.02561100 | -0.88105500 |
| H  | 1.59415400  | 1.31147800  | 0.00001600  |

### 5-ts

|    |             |             |             |
|----|-------------|-------------|-------------|
| C  | 1.42097400  | 0.36592400  | -0.40479100 |
| H  | 1.78497300  | 0.41832500  | -1.43081200 |
| Si | 0.65198000  | -1.11534600 | 0.15683500  |
| H  | 0.50816200  | -1.31470700 | 1.62100300  |
| C  | -1.57034300 | -0.58128600 | -0.22823400 |
| H  | -1.86133900 | -1.32438400 | 0.51526700  |
| H  | -1.64788000 | -0.93240500 | -1.25526000 |
| C  | -1.89138200 | 0.74686500  | 0.03503300  |
| H  | -2.16952600 | 1.07058900  | 1.03385100  |
| H  | -0.23961600 | 1.60695800  | 0.07856700  |
| H  | -2.09130700 | 1.44411500  | -0.77275500 |
| C  | 0.92542800  | 1.60887100  | 0.18829700  |

|   |            |             |             |
|---|------------|-------------|-------------|
| H | 1.05096400 | 1.68292400  | 1.27561400  |
| H | 1.29115100 | 2.52823300  | -0.28124700 |
| H | 0.93862900 | -2.40704300 | -0.52175000 |

### 6

|    |             |             |             |
|----|-------------|-------------|-------------|
| C  | -1.72962200 | -0.30952100 | -0.40127900 |
| H  | -1.86941900 | -0.96854300 | -1.26174300 |
| Si | -0.07545800 | 0.54350200  | -0.17731500 |
| H  | -0.17271000 | 1.42321800  | 1.02428100  |
| C  | 1.35308700  | -0.68713600 | 0.03178000  |
| H  | 1.37009800  | -1.35457300 | -0.84119500 |
| H  | 1.13381200  | -1.32923700 | 0.89560400  |
| C  | 2.72819000  | -0.01820800 | 0.20654400  |
| H  | 2.74987700  | 0.62868500  | 1.09151300  |
| H  | 3.52435100  | -0.76320100 | 0.32527100  |
| H  | 2.98558000  | 0.60263700  | -0.65962300 |
| C  | -2.76194400 | -0.16277200 | 0.43936100  |
| H  | -2.70253900 | 0.47769600  | 1.31798500  |
| H  | -3.71457900 | -0.67053500 | 0.29093200  |
| H  | 0.21367000  | 1.41065100  | -1.35905000 |

### 7

|   |             |             |             |
|---|-------------|-------------|-------------|
| C | -0.19036800 | 0.40904600  | -0.00015100 |
| H | -0.26139100 | 1.50886900  | 0.00022600  |
| H | -2.07026600 | 0.19886200  | 0.00030400  |
| C | 1.20572000  | -0.14159300 | 0.00001600  |
| H | 1.75868000  | 0.21005200  | -0.88103700 |
| H | 1.75783500  | 0.20854600  | 0.88221600  |
| H | 1.17862700  | -1.23408900 | -0.00084400 |
| N | -1.20794200 | -0.35670800 | -0.00000800 |

### 8-ts

|   |             |             |             |
|---|-------------|-------------|-------------|
| C | 1.30161000  | 0.30770500  | 0.27627700  |
| H | 1.79390000  | 0.50636500  | 1.23735500  |
| C | 1.26704700  | -1.01817100 | -0.20095400 |
| H | 1.13823900  | -1.15967900 | -1.27331900 |
| H | 1.89936400  | -1.76100200 | 0.28099400  |
| N | 0.48324300  | 1.19156600  | -0.27591300 |
| H | 0.47436000  | 2.06081900  | 0.26314900  |
| C | -1.43135700 | 0.53403500  | -0.05736500 |
| H | -1.72100800 | 0.92714600  | -1.02436200 |
| H | -1.62389500 | 1.20149600  | 0.77749300  |
| C | -1.43591500 | -0.85770700 | 0.15741900  |
| H | -1.65038500 | -1.21996500 | 1.16281100  |
| H | -1.82308100 | -1.49280000 | -0.63858000 |
| H | -0.07850900 | -1.19851800 | 0.09358500  |

### 9

|   |             |             |             |
|---|-------------|-------------|-------------|
| C | 1.41700100  | 0.54441900  | 0.00190200  |
| H | 1.93967000  | 1.49905900  | 0.03778100  |
| C | -0.82553600 | -0.47173200 | 0.05980900  |
| H | -0.62926500 | -1.00223300 | 1.00847600  |
| H | -0.58269700 | -1.17635900 | -0.74566300 |
| C | -2.29604100 | -0.07289200 | -0.02956000 |
| H | -2.50986800 | 0.41719600  | -0.98536000 |
| H | -2.93972100 | -0.95408100 | 0.05876900  |
| H | -2.57015400 | 0.61847700  | 0.77779600  |
| C | 2.11899000  | -0.60021500 | -0.00660100 |
| H | 3.20237200  | -0.56760100 | -0.00342800 |
| H | 1.65396200  | -1.57957200 | -0.04055000 |
| N | 0.03817300  | 0.68930800  | -0.08932300 |
| H | -0.31799700 | 1.52247900  | 0.36414400  |

**10**

|   |             |             |             |
|---|-------------|-------------|-------------|
| C | -0.37562400 | 0.53222300  | -0.00006200 |
| H | -0.46484400 | 1.61877400  | 0.00003100  |
| P | 1.13033200  | -0.22214800 | -0.00000500 |
| H | 1.92736700  | 0.96734300  | 0.00017300  |
| C | -1.67825300 | -0.21111700 | 0.00001400  |
| H | -2.27845000 | 0.05786800  | 0.88052900  |
| H | -2.27883900 | 0.05835100  | -0.88007800 |
| H | -1.53695000 | -1.29675100 | -0.00029300 |

**11-ts**

|   |             |             |             |
|---|-------------|-------------|-------------|
| C | -1.15696600 | 0.68131100  | 0.41378800  |
| H | -1.47928400 | 0.85420600  | 1.43933700  |
| P | -1.01998700 | -0.91568800 | -0.23390300 |
| H | -1.45381700 | -1.63645200 | 0.92478600  |
| C | 1.39813500  | -0.96204400 | 0.08134000  |
| H | 1.52502600  | -1.59936900 | -0.78760900 |
| H | 1.32605700  | -1.49201500 | 1.02669500  |
| C | 1.94766400  | 0.32979800  | 0.06042300  |
| H | 2.30131200  | 0.76197400  | 0.99560900  |
| H | 2.48855700  | 0.65336100  | -0.82732800 |
| H | 0.79694400  | 1.26792800  | -0.04345500 |
| C | -0.41346200 | 1.70365600  | -0.23312700 |
| H | -0.46333900 | 2.71586900  | 0.17228100  |
| H | -0.39388100 | 1.69349300  | -1.32631300 |

**12**

|   |             |             |             |
|---|-------------|-------------|-------------|
| C | -1.56391100 | 0.33971100  | 0.37563700  |
| H | -1.49964400 | 1.09604800  | 1.16056700  |
| C | 1.23285500  | 0.65772500  | -0.11494800 |
| H | 1.10354200  | 1.39480900  | 0.68719600  |
| H | 1.06210800  | 1.18380000  | -1.06220500 |
| C | 2.65155700  | 0.07579300  | -0.08487900 |
| H | 2.80330400  | -0.65111400 | -0.89093000 |
| H | 3.40072100  | 0.86749900  | -0.20259700 |
| H | 2.85407300  | -0.43341300 | 0.86476600  |
| C | -2.70721600 | 0.19531300  | -0.30027300 |
| H | -3.58254900 | 0.80658000  | -0.08773900 |
| H | -2.81293500 | -0.54400100 | -1.09164400 |
| P | -0.08175100 | -0.68455300 | 0.00151100  |
| H | 0.21792700  | -1.06316000 | 1.34670200  |

**13**

|   |             |             |             |
|---|-------------|-------------|-------------|
| C | 0.23411600  | 0.39956400  | 0.00001300  |
| H | 0.30185200  | 1.51172900  | -0.00003300 |
| O | 1.23790400  | -0.27701000 | -0.00000500 |
| C | -1.17107800 | -0.14849900 | -0.00001700 |
| H | -1.71397300 | 0.21984300  | -0.88050100 |
| H | -1.15583600 | -1.24071900 | -0.00059000 |
| H | -1.71350500 | 0.21883400  | 0.88118900  |

**14-ts**

|   |             |             |             |
|---|-------------|-------------|-------------|
| C | -1.24953200 | -0.35427100 | 0.29306700  |
| H | -1.69442100 | -0.56710500 | 1.28364500  |
| C | -1.33871000 | 0.95364500  | -0.20123400 |
| H | -1.16442500 | 1.11958500  | -1.26256400 |
| H | 0.11560500  | 1.13933900  | 0.10914400  |
| O | -0.46721100 | -1.20924800 | -0.22036000 |
| C | 1.46725800  | -0.52269700 | -0.03576700 |

|   |             |             |             |
|---|-------------|-------------|-------------|
| H | 1.60874700  | -1.18067500 | 0.81301700  |
| H | 1.67849900  | -0.95963200 | -1.00353400 |
| C | 1.41203200  | 0.87221600  | 0.13002300  |
| H | 1.75976200  | 1.48656800  | -0.70120300 |
| H | 1.67321200  | 1.26925000  | 1.11199500  |
| H | -1.98557400 | 1.67329200  | 0.29584800  |

**15**

|   |             |             |             |
|---|-------------|-------------|-------------|
| C | 1.35630400  | -0.55665600 | 0.00004800  |
| H | 1.83872100  | -1.53081400 | 0.00013900  |
| C | -0.78915300 | 0.46704000  | -0.00004600 |
| H | -0.54812500 | 1.06931200  | -0.88777900 |
| H | -0.54809800 | 1.06944300  | 0.88759000  |
| C | -2.24801000 | 0.04562700  | 0.00000000  |
| H | -2.47726100 | -0.55262600 | 0.88754300  |
| H | -2.89592700 | 0.92890100  | -0.00019200 |
| H | -2.47719200 | -0.55296300 | -0.88733400 |
| C | 2.06108100  | 0.57959300  | -0.00002000 |
| H | 3.14360000  | 0.52521700  | 0.00002100  |
| H | 1.61308400  | 1.56628100  | -0.00011000 |
| O | 0.00873400  | -0.71704800 | 0.00002900  |

**16**

|   |             |             |             |
|---|-------------|-------------|-------------|
| S | -1.14739500 | -0.12583500 | 0.00000500  |
| C | 0.34891300  | 0.51399700  | -0.00002700 |
| H | 0.46153400  | 1.60396300  | 0.00007800  |
| C | 1.64089500  | -0.24002900 | -0.00000700 |
| H | 2.23859100  | 0.04304400  | -0.87865300 |
| H | 2.23831600  | 0.04266300  | 0.87895100  |
| H | 1.48103100  | -1.32011100 | -0.00024800 |

**17-ts**

|   |             |             |             |
|---|-------------|-------------|-------------|
| C | -1.19590700 | 0.58018000  | 0.40015100  |
| H | -1.57770400 | 0.74741000  | 1.40969500  |
| C | -0.55269200 | 1.64694700  | -0.25519700 |
| H | 0.71761000  | 1.23180300  | -0.02965400 |
| H | -0.48139100 | 1.60245000  | -1.34207700 |
| S | -0.96880400 | -0.99312100 | -0.13497700 |
| C | 1.48415200  | -0.87865800 | 0.07467700  |
| H | 1.57512500  | -1.49051800 | -0.81530600 |
| H | 1.43485000  | -1.41895500 | 1.01326000  |
| C | 1.90281000  | 0.45793100  | 0.05271000  |
| H | 2.26068100  | 0.89863000  | 0.98315100  |
| H | 2.39556200  | 0.82699900  | -0.84619900 |
| H | -0.65405400 | 2.65372700  | 0.15271800  |

**18**

|   |             |             |             |
|---|-------------|-------------|-------------|
| C | 1.68478900  | -0.31195700 | -0.00005200 |
| H | 2.38773500  | -1.14301000 | -0.00009500 |
| C | -0.95862600 | 0.64294600  | 0.00025700  |
| H | -0.68819000 | 1.22589900  | -0.88659100 |
| H | -0.68861300 | 1.22538700  | 0.88756900  |
| C | -2.45053500 | 0.31096300  | -0.00018700 |
| H | -2.73073600 | -0.26727300 | 0.88640000  |
| H | -3.03699900 | 1.23639200  | -0.00008000 |
| H | -2.73031700 | -0.26679600 | -0.88721900 |
| C | 2.13130300  | 0.94853000  | -0.00008200 |
| H | 3.19951100  | 1.14420400  | -0.00014200 |
| H | 1.47752100  | 1.81433600  | -0.00005900 |
| S | 0.02303100  | -0.90700200 | 0.00003800  |

## 6.4 CBS-QB3 geometries for all the optimized compounds and transition states.

|             |             |             |             |             |             |             |             |
|-------------|-------------|-------------|-------------|-------------|-------------|-------------|-------------|
| <b>1</b>    |             |             |             | H           | 0.48683500  | -1.30116700 | 1.62295700  |
| C           | -1.23346700 | 0.16234400  | 0.00000300  | C           | -1.54904700 | -0.56547600 | -0.24650600 |
| H           | -1.80749700 | -0.15332100 | -0.87832500 | H           | -1.84416200 | -1.32582000 | 0.47502900  |
| H           | -1.80720900 | -0.15298000 | 0.87861900  | H           | -1.61577400 | -0.89010700 | -1.28015400 |
| H           | -1.18188100 | 1.25364200  | -0.00020300 | C           | -1.87710300 | 0.75293800  | 0.04855400  |
| C           | 0.13462700  | -0.45370200 | -0.00003500 | H           | -2.15489000 | 1.04904500  | 1.05320100  |
| H           | 0.16672100  | -1.54206300 | 0.00010100  | H           | -0.23078200 | 1.60274000  | 0.08961400  |
| C           | 1.28040800  | 0.22044700  | -0.00003000 | H           | -2.08417400 | 1.46552900  | -0.74017500 |
| H           | 2.23888300  | -0.28624400 | 0.00008200  | C           | 0.93641100  | 1.60138500  | 0.18243600  |
| H           | 1.30157300  | 1.30642800  | 0.00009300  | H           | 1.07511500  | 1.68578000  | 1.26451200  |
|             |             |             |             | H           | 1.29512300  | 2.51185700  | -0.30263100 |
|             |             |             |             | H           | 0.89613100  | -2.40486300 | -0.51332300 |
| <b>2-ts</b> |             |             |             | <b>6</b>    |             |             |             |
| C           | 0.55455100  | 1.25717900  | -0.26553900 | C           | -1.85808100 | -0.31528600 | -0.00003200 |
| H           | 0.42198000  | 1.22484600  | -1.34208200 | H           | -2.59769100 | -1.11679200 | -0.00011900 |
| C           | 1.30577300  | 0.26681600  | 0.34283200  | C           | 1.10490100  | 0.67684400  | -0.00017800 |
| H           | 1.59920800  | 0.40906500  | 1.38096300  | H           | 0.87633300  | 1.29529800  | 0.87556300  |
| C           | 1.25510900  | -1.05138100 | -0.15970500 | H           | 0.87653900  | 1.29487300  | -0.87627300 |
| H           | -0.06546300 | -1.22923300 | -0.02075800 | C           | 2.59820100  | 0.30130000  | 0.00009500  |
| H           | 1.77793800  | -1.83630100 | 0.38150600  | H           | 2.86237000  | -0.29010200 | -0.88121500 |
| H           | 1.28863300  | -1.18200800 | -1.24101400 | H           | 3.23360100  | 1.19171500  | -0.00005500 |
| C           | -1.43259700 | 0.54428500  | 0.10737200  | H           | 2.86215600  | -0.28965800 | 0.88176600  |
| H           | -1.54298200 | 1.01616900  | 1.07611100  | C           | -2.30980300 | 0.94114300  | 0.00001700  |
| H           | -1.81282900 | 1.13221700  | -0.71893700 | H           | -3.37126300 | 1.17537200  | -0.00002100 |
| C           | -1.46269600 | -0.85761800 | 0.02335700  | H           | -1.64016300 | 1.79667700  | 0.00009800  |
| H           | -1.67717800 | -1.42696500 | 0.92404800  | Si          | -0.05326300 | -0.81176400 | 0.00003800  |
| H           | -1.82432000 | -1.31629300 | -0.89276400 | H           | 0.21626200  | -1.65817800 | 1.19287900  |
| H           | 0.51416900  | 2.25281500  | 0.16301500  | H           | 0.21623500  | -1.65852200 | -1.19256500 |
| <b>3</b>    |             |             |             | <b>7</b>    |             |             |             |
| C           | 1.52385800  | 0.52222200  | -0.00001900 | C           | -0.19102400 | 0.40709400  | -0.00012200 |
| H           | 2.13626800  | 1.42288800  | -0.00013400 | H           | -0.26589500 | 1.50495000  | 0.00030000  |
| C           | -0.86077500 | -0.46678600 | -0.00023500 | H           | -2.06762100 | 0.19299900  | 0.00011700  |
| H           | -0.63091800 | -1.08248400 | 0.87631200  | C           | 1.20468900  | -0.14092000 | -0.00008800 |
| H           | -0.63123500 | -1.08195300 | -0.87723600 | H           | 1.75559000  | 0.21170600  | -0.87863400 |
| C           | -2.35099100 | -0.11360100 | 0.00013000  | H           | 1.75428700  | 0.20918000  | 0.88067100  |
| H           | -2.61961400 | 0.47499800  | -0.88267700 | H           | 1.17737700  | -1.23076400 | -0.00128000 |
| H           | -2.97256900 | -1.01292500 | 0.00002000  | N           | -1.20510400 | -0.35501700 | 0.00001300  |
| H           | -2.61928200 | 0.47455200  | 0.88333500  | <b>8-ts</b> |             |             |             |
| C           | 2.13798700  | -0.65783500 | 0.00009300  | C           | 1.29931100  | 0.29981200  | 0.27893100  |
| H           | 3.22005300  | -0.72583700 | 0.00004200  | H           | 1.78774400  | 0.49261000  | 1.24069600  |
| H           | 1.59520500  | -1.59659600 | 0.00026600  | C           | 1.26669000  | -1.02013200 | -0.20184000 |
| C           | 0.03870900  | 0.77153800  | 0.00000500  | H           | 1.12290200  | -1.16299300 | -1.26897100 |
| H           | -0.20531900 | 1.39691600  | 0.87065200  | H           | 1.88495500  | -1.76885800 | 0.28264300  |
| H           | -0.20531600 | 1.39722100  | -0.87042500 | N           | 0.49933100  | 1.19245800  | -0.27745800 |
| <b>4</b>    |             |             |             | H           | 0.49429900  | 2.05987700  | 0.25773700  |
| Si          | -1.15074400 | 0.10220200  | 0.00003600  | C           | -1.44071600 | 0.53696100  | -0.05415500 |
| H           | -1.42626500 | 1.55024000  | -0.00037400 | H           | -1.71881200 | 0.93487300  | -1.01905200 |
| H           | -2.33363500 | -0.77382100 | 0.00014500  | H           | -1.62107200 | 1.20081400  | 0.78238900  |
| C           | 0.43880300  | -0.53304600 | -0.00009900 | C           | -1.43806000 | -0.85235300 | 0.15412200  |
| H           | 0.52841000  | -1.61814100 | -0.00017000 | H           | -1.65121700 | -1.21930100 | 1.15534700  |
| C           | 1.73851800  | 0.22534000  | 0.00003400  | H           | -1.81901100 | -1.48419700 | -0.64394800 |
| H           | 2.34416100  | -0.02554800 | 0.87924900  | H           | -0.09844900 | -1.18575700 | 0.09301900  |
| H           | 2.34439000  | -0.02540400 | -0.87906900 | <b>9</b>    |             |             |             |
| H           | 1.58943700  | 1.30808000  | 0.00010100  | C           | 1.41576100  | 0.54289000  | -0.00042500 |
| <b>5-ts</b> |             |             |             | H           | 1.93513700  | 1.49703700  | 0.03188900  |
| C           | 1.41202600  | 0.35179900  | -0.40599200 | C           | -0.83037200 | -0.47501800 | 0.06989600  |
| H           | 1.76126700  | 0.38814100  | -1.43560800 |             |             |             |             |
| Si          | 0.63439900  | -1.11607200 | 0.16397300  |             |             |             |             |

|   |             |             |             |
|---|-------------|-------------|-------------|
| H | -0.64892700 | -0.99600900 | 1.02385200  |
| H | -0.58435300 | -1.18739800 | -0.72477000 |
| C | -2.29610500 | -0.06841200 | -0.03913600 |
| H | -2.49323400 | 0.41807000  | -0.99760500 |
| H | -2.94580800 | -0.94248500 | 0.04405700  |
| H | -2.57387800 | 0.62644800  | 0.76038500  |
| C | 2.12380400  | -0.59542200 | -0.01275900 |
| H | 3.20424200  | -0.55400200 | -0.01501400 |
| H | 1.66452700  | -1.57494400 | -0.04140100 |
| N | 0.04042900  | 0.68007000  | -0.07487500 |
| H | -0.31923500 | 1.52856300  | 0.33727900  |

### 10

|   |             |             |             |
|---|-------------|-------------|-------------|
| C | -0.37148600 | 0.53044800  | 0.00005100  |
| H | -0.44973800 | 1.61491500  | -0.00016300 |
| P | 1.12571600  | -0.22195400 | -0.00000900 |
| H | 1.92244800  | 0.95919200  | 0.00000000  |
| C | -1.67484100 | -0.20937600 | -0.00001200 |
| H | -2.27207200 | 0.06001400  | 0.87886800  |
| H | -2.27319500 | 0.06160200  | -0.87774200 |
| H | -1.53523000 | -1.29285400 | -0.00107100 |

### 11-ts

|   |             |             |             |
|---|-------------|-------------|-------------|
| C | -1.14589400 | 0.68106100  | 0.41604300  |
| H | -1.46051300 | 0.84328000  | 1.44282500  |
| P | -1.02259100 | -0.90780300 | -0.23610300 |
| H | -1.44840600 | -1.62733700 | 0.91737100  |
| C | 1.38860400  | -0.96540800 | 0.08777900  |
| H | 1.50848100  | -1.60918800 | -0.77410300 |
| H | 1.31047700  | -1.48280800 | 1.03634400  |
| C | 1.94421200  | 0.32075200  | 0.05326200  |
| H | 2.30088100  | 0.76021300  | 0.98078300  |
| H | 2.47973100  | 0.63432700  | -0.83798900 |
| H | 0.80465100  | 1.25665000  | -0.04909600 |
| C | -0.40734500 | 1.70287100  | -0.22994200 |
| H | -0.44593600 | 2.70937100  | 0.18284500  |
| H | -0.38795500 | 1.69687900  | -1.32028600 |

### 12

|   |             |             |             |
|---|-------------|-------------|-------------|
| C | -1.72799900 | -0.29680300 | 0.14227100  |
| H | -2.42108700 | -1.09432000 | 0.40624200  |
| C | 1.00045900  | 0.65149800  | -0.00647200 |
| H | 0.67096600  | 1.21997000  | 0.86720900  |
| H | 0.81012100  | 1.27076600  | -0.88847500 |
| C | 2.49695300  | 0.32725500  | 0.08315600  |
| H | 2.83868900  | -0.23383000 | -0.79072200 |
| H | 3.08903500  | 1.24454100  | 0.14307000  |
| H | 2.72323100  | -0.27015900 | 0.97071400  |
| C | -2.20196300 | 0.93944200  | -0.01452700 |
| H | -3.25465500 | 1.16063400  | 0.12928900  |
| H | -1.57096600 | 1.77688300  | -0.29187400 |
| P | -0.03295000 | -0.89115300 | -0.19141400 |
| H | 0.20421700  | -1.43554100 | 1.09918600  |

### 13

|   |             |             |             |
|---|-------------|-------------|-------------|
| C | 0.23550400  | 0.39707200  | -0.00011700 |
| H | 0.30483500  | 1.50860300  | 0.00008700  |
| O | 1.23324800  | -0.27647400 | 0.00002700  |
| C | -1.16883600 | -0.14788800 | -0.00002300 |
| H | -1.70812000 | 0.22358900  | -0.87820800 |
| H | -1.15591800 | -1.23755500 | -0.00097400 |
| H | -1.70679700 | 0.22204800  | 0.87971900  |

### 14-ts

|   |             |             |             |
|---|-------------|-------------|-------------|
| C | -1.24818200 | -0.34964300 | 0.29487300  |
| H | -1.69372300 | -0.55513400 | 1.28469900  |
| C | -1.34581800 | 0.95035700  | -0.20643600 |
| H | -1.15095000 | 1.11926800  | -1.26066300 |
| H | 0.13057000  | 1.12509800  | 0.11144300  |
| O | -0.47624700 | -1.20936400 | -0.21519800 |
| C | 1.47898500  | -0.52052400 | -0.04228900 |
| H | 1.61545400  | -1.18585100 | 0.79810800  |
| H | 1.67764400  | -0.94816400 | -1.01385300 |
| C | 1.41405200  | 0.86934900  | 0.13450600  |
| H | 1.75614700  | 1.49126300  | -0.68997800 |
| H | 1.66789600  | 1.25980800  | 1.11818000  |
| H | -1.98728400 | 1.67138700  | 0.28972000  |

### 15

|   |             |             |             |
|---|-------------|-------------|-------------|
| C | 1.35609200  | -0.55540100 | 0.00012600  |
| H | 1.83691200  | -1.52787500 | -0.00017000 |
| C | -0.79267800 | 0.47050900  | 0.00011200  |
| H | -0.55490500 | 1.07114000  | -0.88667400 |
| H | -0.55512700 | 1.07074800  | 0.88721900  |
| C | -2.24721000 | 0.04162000  | -0.00005800 |
| H | -2.47146500 | -0.55637400 | 0.88578900  |
| H | -2.89974700 | 0.91850900  | -0.00094700 |
| H | -2.47085400 | -0.55750700 | -0.88532500 |
| C | 2.06222400  | 0.57654000  | -0.00000500 |
| H | 3.14198900  | 0.51696900  | -0.00036200 |
| H | 1.61761200  | 1.56200800  | -0.00020200 |
| O | 0.01062800  | -0.71215300 | -0.00004700 |

### 16

|   |             |             |             |
|---|-------------|-------------|-------------|
| S | -1.14215700 | -0.12612900 | 0.00000000  |
| C | 0.34614800  | 0.51343700  | 0.00000300  |
| H | 0.45054300  | 1.60159300  | -0.00000900 |
| C | 1.63517000  | -0.23936500 | -0.00000400 |
| H | 2.23052300  | 0.04466000  | -0.87667000 |
| H | 2.23028200  | 0.04421100  | 0.87697400  |
| H | 1.47525900  | -1.31684200 | -0.00029000 |

### 17-ts

|   |             |             |             |
|---|-------------|-------------|-------------|
| C | -1.18575700 | 0.57920100  | 0.40315700  |
| H | -1.56129900 | 0.73895600  | 1.41347500  |
| C | -0.55114300 | 1.64492800  | -0.25327300 |
| H | 0.72189200  | 1.22102800  | -0.03345200 |
| H | -0.47736900 | 1.59999200  | -1.33701500 |
| S | -0.97044700 | -0.98715400 | -0.13725000 |
| C | 1.47927400  | -0.87998300 | 0.08008900  |
| H | 1.56370400  | -1.49586400 | -0.80446800 |
| H | 1.42432700  | -1.41000200 | 1.02108200  |
| C | 1.90039100  | 0.45202000  | 0.04698400  |
| H | 2.25797700  | 0.90042900  | 0.97075100  |
| H | 2.38540900  | 0.81519700  | -0.85521300 |
| H | -0.64407300 | 2.64774200  | 0.15910600  |

### 18

|   |             |             |             |
|---|-------------|-------------|-------------|
| C | 1.68030400  | -0.31155100 | 0.00068100  |
| H | 2.37568700  | -1.14610600 | 0.00240200  |
| C | -0.95828500 | 0.64111400  | -0.00021200 |
| H | -0.68850500 | 1.21958400  | -0.88685900 |
| H | -0.68751300 | 1.21961600  | 0.88611600  |
| C | -2.44902700 | 0.30835900  | 0.00053600  |

|   |             |             |             |   |            |             |             |
|---|-------------|-------------|-------------|---|------------|-------------|-------------|
| H | -2.72852200 | -0.26812800 | 0.88548700  | H | 3.19914100 | 1.13212700  | 0.00092000  |
| H | -3.03538300 | 1.23092400  | 0.00064300  | H | 1.48287700 | 1.80910600  | -0.00180200 |
| H | -2.72936400 | -0.26841100 | -0.88396900 | S | 0.02375400 | -0.90103700 | -0.00050100 |
| C | 2.13226100  | 0.94339200  | -0.00016000 |   |            |             |             |

## 7. The date of distortion, interaction, and total energies along the reaction pathways of the Ene-reaction between the C-H bond in hetero enes and ethylene.

### 7.1 The data of distortion, interaction and total energies along the reaction pathways of the Ene-reaction between propylene and ethylene.

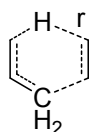

| Step | r    | $\Delta E^\ddagger$ | $\Delta E^\ddagger_{\text{dist}}$ | $\Delta E^\ddagger_{\text{int}}$ |
|------|------|---------------------|-----------------------------------|----------------------------------|
| 1    | 2.98 | 0.4                 | 0.0                               | 0.4                              |
| 2    | 2.91 | 1.2                 | 0.1                               | 1.1                              |
| 3    | 2.76 | 1.8                 | 0.1                               | 1.7                              |
| 4    | 2.72 | 2.1                 | 0.2                               | 1.9                              |
| 5    | 2.67 | 2.4                 | 0.2                               | 2.1                              |
| 6    | 2.62 | 2.7                 | 0.3                               | 2.4                              |
| 7    | 2.58 | 3.1                 | 0.4                               | 2.7                              |
| 8    | 2.53 | 3.5                 | 0.5                               | 3.0                              |
| 9    | 2.48 | 4.1                 | 0.6                               | 3.4                              |
| 10   | 2.44 | 4.7                 | 0.7                               | 3.9                              |
| 11   | 2.39 | 5.3                 | 0.9                               | 4.5                              |
| 12   | 2.34 | 6.1                 | 1.0                               | 5.1                              |
| 13   | 2.30 | 7.0                 | 1.2                               | 5.8                              |
| 14   | 2.25 | 8.0                 | 1.3                               | 6.6                              |
| 15   | 2.21 | 8.5                 | 1.6                               | 7.0                              |
| 16   | 2.16 | 9.8                 | 1.8                               | 8.0                              |
| 17   | 2.11 | 11.2                | 2.2                               | 9.1                              |

|    |      |      |      |       |
|----|------|------|------|-------|
| 18 | 2.01 | 14.7 | 2.7  | 12.0  |
| 19 | 1.96 | 16.8 | 3.6  | 13.2  |
| 20 | 1.91 | 19.6 | 5.5  | 14.2  |
| 21 | 1.86 | 22.1 | 7.3  | 14.8  |
| 22 | 1.80 | 24.7 | 9.9  | 14.8  |
| 23 | 1.73 | 27.0 | 13.9 | 13.1  |
| 24 | 1.66 | 29.8 | 20.1 | 9.6   |
| 25 | 1.55 | 32.0 | 30.4 | 1.6   |
| 26 | 1.45 | 32.9 | 42.0 | -9.1  |
| 27 | 1.37 | 32.4 | 51.9 | -19.5 |
| 28 | 1.24 | 29.3 | 69.0 | -39.7 |
| 29 | 1.16 | 25.4 | 85.7 | -60.3 |

**7.2 The data of distortion, interaction and total energies along the reaction pathways of the Ene-reaction between ethylidenesilane and ethylene.**

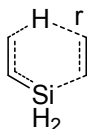

| Step | r    | $\Delta E^\ddagger$ | $\Delta E^\ddagger_{\text{dist}}$ | $\Delta E^\ddagger_{\text{int}}$ |
|------|------|---------------------|-----------------------------------|----------------------------------|
| 1    | 3.17 | 1.8                 | 0.3                               | 1.5                              |
| 2    | 2.84 | 2.7                 | 1.1                               | 1.5                              |
| 3    | 2.62 | 4.3                 | 2.2                               | 2.1                              |
| 4    | 2.54 | 5.0                 | 2.6                               | 2.4                              |
| 5    | 2.41 | 6.6                 | 3.2                               | 3.5                              |
| 6    | 2.35 | 7.6                 | 4.1                               | 3.5                              |
| 7    | 2.29 | 8.6                 | 5.1                               | 3.5                              |
| 8    | 2.22 | 9.1                 | 6.3                               | 2.8                              |
| 9    | 2.15 | 10.2                | 8.6                               | 1.6                              |
| 10   | 2.08 | 11.1                | 10.8                              | 0.2                              |

|    |      |       |      |        |
|----|------|-------|------|--------|
| 11 | 2.00 | 11.7  | 14.0 | -2.3   |
| 12 | 1.92 | 11.8  | 18.5 | -6.7   |
| 13 | 1.85 | 11.5  | 22.4 | -10.9  |
| 14 | 1.78 | 10.8  | 27.5 | -16.7  |
| 15 | 1.62 | 8.4   | 42.6 | -34.1  |
| 16 | 1.40 | 1.4   | 66.6 | -65.2  |
| 17 | 1.19 | -12.4 | 92.4 | -104.8 |

**7.3 The data of distortion, interaction and total energies along the reaction pathways of the Ene-reaction between ethanimine and ethylene.**

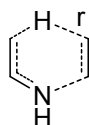

| Step | r    | $\Delta E^\ddagger$ | $\Delta E^\ddagger_{\text{dist}}$ | $\Delta E^\ddagger_{\text{int}}$ |
|------|------|---------------------|-----------------------------------|----------------------------------|
| 1    | 3.05 | 0.0                 | 0.0                               | 0.0                              |
| 2    | 2.97 | 0.3                 | 0.0                               | 0.3                              |
| 3    | 2.89 | 0.6                 | 0.0                               | 0.6                              |
| 4    | 2.80 | 1.6                 | 0.1                               | 1.6                              |
| 5    | 2.70 | 1.6                 | 0.2                               | 1.5                              |
| 6    | 2.50 | 3.5                 | 0.5                               | 3.0                              |
| 7    | 2.40 | 4.8                 | 0.7                               | 4.2                              |
| 8    | 2.16 | 10.3                | 0.7                               | 9.5                              |
| 9    | 2.11 | 11.8                | 1.0                               | 10.8                             |
| 10   | 2.06 | 13.5                | 1.3                               | 12.2                             |
| 11   | 2.01 | 15.4                | 2.0                               | 13.4                             |
| 12   | 1.96 | 17.5                | 2.7                               | 14.8                             |
| 13   | 1.90 | 20.0                | 3.8                               | 16.2                             |
| 14   | 1.84 | 23.3                | 5.3                               | 17.9                             |
| 15   | 1.78 | 26.3                | 8.3                               | 17.9                             |



|    |      |      |      |       |
|----|------|------|------|-------|
| 16 | 1.71 | 29.0 | 12.2 | 16.8  |
| 17 | 1.61 | 32.5 | 19.2 | 13.3  |
| 18 | 1.38 | 37.1 | 43.4 | -6.3  |
| 19 | 1.28 | 36.2 | 55.9 | -19.7 |
| 20 | 1.18 | 33.8 | 72.1 | -38.2 |

**7.4 The data of distortion, interaction and total energies along the reaction pathways of the Ene-reaction between ethylenephosphine and ethylene.**

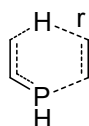

| Step | r    | $\Delta E^\ddagger$ | $\Delta E^\ddagger_{\text{dist}}$ | $\Delta E^\ddagger_{\text{int}}$ |
|------|------|---------------------|-----------------------------------|----------------------------------|
| 1    | 3.09 | -0.1                | 0.0                               | -0.1                             |
| 2    | 2.96 | 0.3                 | 0.1                               | 0.2                              |
| 3    | 2.88 | 0.5                 | 0.1                               | 0.4                              |
| 4    | 2.80 | 0.9                 | 0.2                               | 0.6                              |
| 5    | 2.71 | 1.4                 | 0.4                               | 1.0                              |
| 6    | 2.61 | 2.1                 | 0.6                               | 1.5                              |
| 7    | 2.52 | 3.0                 | 0.9                               | 2.1                              |
| 8    | 2.42 | 4.0                 | 1.2                               | 2.9                              |
| 9    | 2.38 | 4.7                 | 1.3                               | 3.4                              |
| 10   | 2.19 | 8.0                 | 2.2                               | 5.7                              |
| 11   | 2.14 | 9.0                 | 2.6                               | 6.4                              |
| 12   | 2.09 | 10.8                | 3.0                               | 7.8                              |
| 13   | 1.99 | 13.4                | 4.4                               | 9.1                              |
| 14   | 1.93 | 14.9                | 5.3                               | 9.6                              |
| 15   | 1.88 | 16.5                | 6.6                               | 9.9                              |
| 16   | 1.82 | 18.2                | 8.4                               | 9.7                              |
| 17   | 1.75 | 19.3                | 11.1                              | 8.2                              |

|    |      |      |      |       |
|----|------|------|------|-------|
| 18 | 1.67 | 21.0 | 15.5 | 5.6   |
| 19 | 1.58 | 22.4 | 23.2 | -0.8  |
| 20 | 1.45 | 22.9 | 35.9 | -13.0 |
| 21 | 1.15 | 15.1 | 76.8 | -61.7 |

**7.5 The data of distortion, interaction and total energies along the reaction pathways of the Ene-reaction between acetaldehyde and ethylene.**

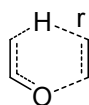

| Step | r    | $\Delta E^\ddagger$ | $\Delta E^\ddagger_{\text{dist}}$ | $\Delta E^\ddagger_{\text{int}}$ |
|------|------|---------------------|-----------------------------------|----------------------------------|
| 1    | 2.99 | -0.1                | 0.0                               | -0.2                             |
| 2    | 2.89 | 0.2                 | 0.1                               | 0.1                              |
| 3    | 2.79 | 0.6                 | 0.1                               | 0.5                              |
| 4    | 2.68 | 1.2                 | 0.2                               | 1.0                              |
| 5    | 2.57 | 2.0                 | 0.3                               | 1.7                              |
| 6    | 2.46 | 3.2                 | 0.5                               | 2.7                              |
| 7    | 2.09 | 11.0                | 0.7                               | 10.4                             |
| 8    | 1.97 | 15.2                | 2.4                               | 12.9                             |
| 9    | 1.90 | 17.9                | 3.6                               | 14.3                             |
| 10   | 1.76 | 25.4                | 9.7                               | 15.7                             |
| 11   | 1.66 | 29.2                | 16.3                              | 12.9                             |
| 12   | 1.53 | 34.7                | 28.1                              | 6.7                              |
| 13   | 1.39 | 39.1                | 43.4                              | -4.3                             |
| 14   | 1.31 | 40.0                | 52.7                              | -12.8                            |
| 15   | 1.22 | 39.8                | 65.7                              | -25.9                            |
| 16   | 1.17 | 38.5                | 78.6                              | -40.1                            |

**7.6 The data of distortion, interaction and total energies along the reaction pathways of the Ene-reaction between ethanethial and ethylene.**

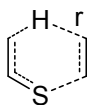

| Step | r    | $\Delta E^\ddagger$ | $\Delta E^\ddagger_{\text{dist}}$ | $\Delta E^\ddagger_{\text{int}}$ |
|------|------|---------------------|-----------------------------------|----------------------------------|
| 1    | 3.01 | -0.2                | 0.0                               | -0.3                             |
| 2    | 2.93 | -0.1                | 0.2                               | -0.2                             |
| 3    | 2.84 | 0.1                 | 0.2                               | -0.1                             |
| 4    | 2.75 | 0.4                 | 0.3                               | 0.1                              |
| 5    | 2.66 | 0.9                 | 0.5                               | 0.4                              |
| 6    | 2.57 | 1.4                 | 0.7                               | 0.8                              |
| 7    | 2.47 | 2.1                 | 0.8                               | 1.3                              |
| 8    | 2.38 | 3.1                 | 1.0                               | 2.0                              |
| 9    | 2.33 | 3.6                 | 1.1                               | 2.5                              |
| 10   | 2.29 | 4.2                 | 1.3                               | 2.9                              |
| 11   | 2.24 | 4.9                 | 1.4                               | 3.5                              |
| 12   | 2.19 | 5.7                 | 1.5                               | 4.2                              |
| 13   | 2.15 | 6.6                 | 1.7                               | 4.9                              |
| 14   | 2.10 | 7.5                 | 1.9                               | 5.6                              |
| 15   | 2.00 | 9.9                 | 2.5                               | 7.3                              |
| 16   | 1.95 | 11.2                | 3.0                               | 8.2                              |
| 17   | 1.77 | 16.8                | 6.4                               | 10.4                             |
| 18   | 1.70 | 18.2                | 9.2                               | 8.9                              |
| 19   | 1.63 | 20.3                | 14.3                              | 6.0                              |
| 20   | 1.51 | 22.3                | 23.7                              | -1.4                             |
| 21   | 1.41 | 23.4                | 34.5                              | -11.1                            |
| 22   | 1.38 | 23.4                | 37.5                              | -14.0                            |
| 23   | 1.19 | 20.6                | 61.9                              | -41.3                            |
